# Supplementary material
Source: publisher site journal article supplement (https://biss.pensoft.net/article/download/suppl/7970584/)
Supplement: Supplementary file 1

Class Name,Description,Normative definition link,Issue link
Address,A physical postal address for an organisational unit or person.,https://github.com/tdwg/rs.tdwg.org/blob/latimer/process/page_build_scripts/index.md#ltc_Address,https://github.com/tdwg/cd/issues/208
ChronometricAge,The age of a specimen or related materials that is generated from a dating assay.,https://github.com/tdwg/rs.tdwg.org/blob/latimer/process/page_build_scripts/index.md#dwc_ChronometricAge,https://github.com/tdwg/cd/issues/268
CollectionDescriptionScheme,"A grouping of multiple ObjectGroups for a particular use case, purpose or implementation.",https://github.com/tdwg/rs.tdwg.org/blob/latimer/process/page_build_scripts/index.md#ltc_CollectionDescriptionScheme,https://github.com/tdwg/cd/issues/109
CollectionStatusHistory,A historical log of changes to and statuses of the described collection over time.,https://github.com/tdwg/rs.tdwg.org/blob/latimer/process/page_build_scripts/index.md#ltc_CollectionStatusHistory,https://github.com/tdwg/cd/issues/120
ContactDetail,Details of a method by which an entity such as a Person or OrganisationalUnit may be contacted.,https://github.com/tdwg/rs.tdwg.org/blob/latimer/process/page_build_scripts/index.md#ltc_ContactDetail,https://github.com/tdwg/cd/issues/329
Event,An action that occurs at some location during some time.,https://github.com/tdwg/rs.tdwg.org/blob/latimer/process/page_build_scripts/index.md#ltc_Event,https://github.com/tdwg/cd/issues/362
GeographicOrigin,The geographic location from which objects associated with the CollectionDescription were collected.,https://github.com/tdwg/rs.tdwg.org/blob/latimer/process/page_build_scripts/index.md#ltc_GeographicOrigin,https://github.com/tdwg/cd/issues/131
GeologicalContext,"Geological information, such as stratigraphy, that qualifies a region or place.",https://github.com/tdwg/rs.tdwg.org/blob/latimer/process/page_build_scripts/index.md#dwc_GeologicalContext,https://github.com/tdwg/cd/issues/178
Identifier,"A numeric or textual value, or reference such as an IRI, that can be used to uniquely identify the object to which it is attached.",https://github.com/tdwg/rs.tdwg.org/blob/latimer/process/page_build_scripts/index.md#ltc_Identifier,https://github.com/tdwg/cd/issues/126
MeasurementOrFact,"A measurement of or fact about the ObjectGroup representing the objects in the collection description, or the relationship between the ObjectGroup and an associated class.",https://github.com/tdwg/rs.tdwg.org/blob/latimer/process/page_build_scripts/index.md#dwc_MeasurementOrFact,https://github.com/tdwg/cd/issues/289
ObjectClassification,"An informal classification of the type of objects within the ObjectGroup, using a hierarchical structure.",https://github.com/tdwg/rs.tdwg.org/blob/latimer/process/page_build_scripts/index.md#ltc_ObjectClassification,https://github.com/tdwg/cd/issues/214
ObjectGroup,An intentionally grouped set of objects with one or more common characteristics.,https://github.com/tdwg/rs.tdwg.org/blob/latimer/process/page_build_scripts/index.md#ltc_ObjectGroup,https://github.com/tdwg/cd/issues/55
OrganisationalUnit,"A unit within an organisational hierarchy which may be at, above or below the institutional level.",https://github.com/tdwg/rs.tdwg.org/blob/latimer/process/page_build_scripts/index.md#ltc_OrganisationalUnit,https://github.com/tdwg/cd/issues/197
Person,A person (alive or dead).,https://github.com/tdwg/rs.tdwg.org/blob/latimer/process/page_build_scripts/index.md#ltc_Person,https://github.com/tdwg/cd/issues/219
PersonRole,A qualified association between a Person or OrganisationalUnit and an entity such as an ObjectGroup or MeasurementOrFact that enables the relationship to be contextualised with a specific role and time period.,https://github.com/tdwg/rs.tdwg.org/blob/latimer/process/page_build_scripts/index.md#ltc_PersonRole,https://github.com/tdwg/cd/issues/316
RecordLevel,The machine-actionable information profile for the collection description digital object.,https://github.com/tdwg/rs.tdwg.org/blob/latimer/process/page_build_scripts/index.md#ltc_RecordLevel,https://github.com/tdwg/cd/issues/43
Reference,A reference to external resources and information related to the collection description.,https://github.com/tdwg/rs.tdwg.org/blob/latimer/process/page_build_scripts/index.md#dwc_Reference,https://github.com/tdwg/cd/issues/231
ResourceRelationship,"A relationship between an instance of a class in the collection description standard to another instance of the same class, or an instance of a different class in the standard.",https://github.com/tdwg/rs.tdwg.org/blob/latimer/process/page_build_scripts/index.md#dwc_ResourceRelationship,https://github.com/tdwg/cd/issues/279
SchemeMeasurementOrFact,"A type of measurement or fact used by the CollectionDescriptionScheme, and the rules relating to its application.",https://github.com/tdwg/rs.tdwg.org/blob/latimer/process/page_build_scripts/index.md#ltc_SchemeMeasurementOrFact,https://github.com/tdwg/cd/issues/117
SchemeTerm,A Latimer Core term used by the CollectionDescriptionScheme and the rules relating to its application.,https://github.com/tdwg/rs.tdwg.org/blob/latimer/process/page_build_scripts/index.md#ltc_SchemeTerm,https://github.com/tdwg/cd/issues/113
StorageLocation,"A physical location (such as a building, room, cabinet or drawer) within the holding institution where objects associated with the collection description are stored or exhibited.",https://github.com/tdwg/rs.tdwg.org/blob/latimer/process/page_build_scripts/index.md#ltc_StorageLocation,https://github.com/tdwg/cd/issues/164
Taxon,A group of organisms (sensu http://purl.obolibrary.org/obo/OBI_0100026) considered by taxonomists to form a homogeneous unit.,https://github.com/tdwg/rs.tdwg.org/blob/latimer/process/page_build_scripts/index.md#dwc_Taxon,https://github.com/tdwg/cd/issues/269
TemporalCoverage,A record of a time range represented by the collection within a particular context.,https://github.com/tdwg/rs.tdwg.org/blob/latimer/process/page_build_scripts/index.md#ltc_TemporalCoverage,https://github.com/tdwg/cd/issues/333
